# Supplementary material for: Triage of high-risk HPV-positive women in population-based screening by miRNA expression analysis in cervical scrapes; a feasibility study
Source: PubMed Central journal article supplement (PMC5992707; doi:10.1186/s13148-018-0509-9), 2018-06-07

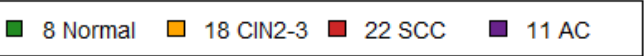

**miR-9-5p**

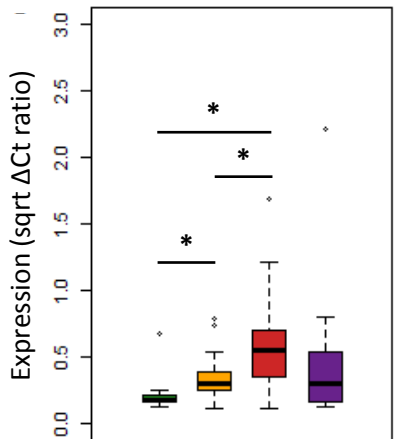

**miR-15b-5p**

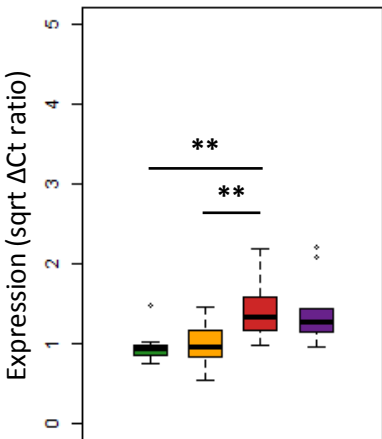

**miR-125b-5p**

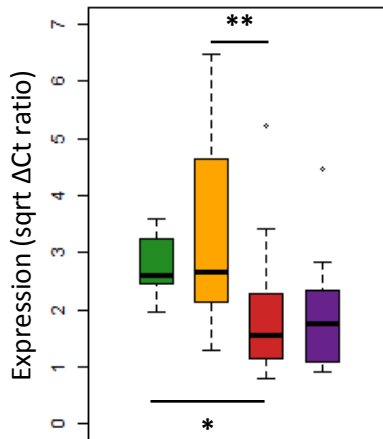

**miR-149-5p**

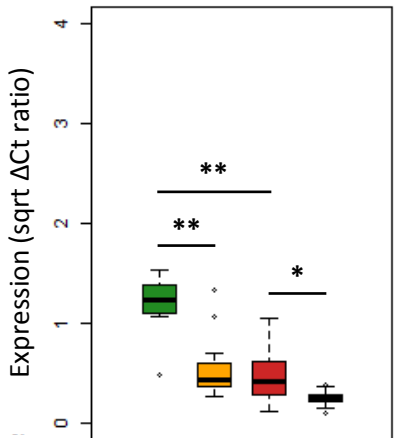

**miR-203a-3p**

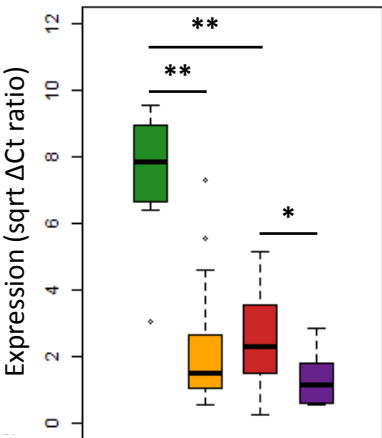

**miR-375**

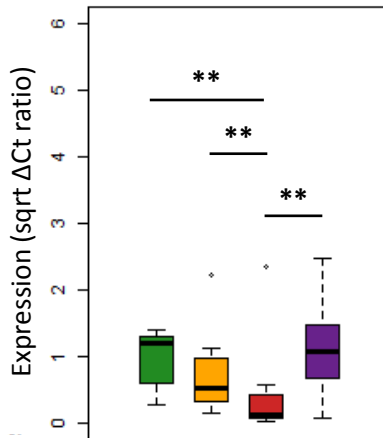

Supplement: 13148_2018_509_MOESM2_ESM.pdf [file 13148_2018_509_MOESM2_ESM.pdf]
