# Supplementary material for: Triage of high-risk HPV-positive women in population-based screening by miRNA expression analysis in cervical scrapes; a feasibility study
Source: PubMed Central journal article supplement (PMC5992707; doi:10.1186/s13148-018-0509-9), 2018-06-07
Supplement: 13148_2018_509_MOESM4_ESM.pdf [file 13148_2018_509_MOESM4_ESM.pdf]

**Additional file 3: Table S2.** P-values of differentially expressed miRNAs in cervical scrapes. P-values were determined by Wilcoxon rank test and corrected applying the Benjamini-Hochberg correction method for multiple testing. qRT-PCR results obtained from cervical scrapes of women without disease (n=66), CIN2-3 (n=121), SCC (n=29) or AC (n=9) were included in the analysis.

| <i>miRNA</i>         | <i>Kruskal Wallis</i> | <i>CIN3 vs normal</i> | <i>SCC vs normal</i> | <i>SCC vs CIN3</i> | <i>AC vs normal</i> |
|----------------------|-----------------------|-----------------------|----------------------|--------------------|---------------------|
| <i>Upregulated</i>   |                       |                       |                      |                    |                     |
| miR-9-5p             | <b>0.000</b>          | <b>0.044</b>          | <b>0.000</b>         | <b>0.000</b>       | <b>0.002</b>        |
| miR-15b-5p           | <b>0.000</b>          | <b>0.037</b>          | <b>0.000</b>         | <b>0.000</b>       | <b>0.000</b>        |
| <i>Downregulated</i> |                       |                       |                      |                    |                     |
| miR-125b-5p          | <b>0.001</b>          | <b>0.006</b>          | <b>0.044</b>         | 0.586              | <b>0.002</b>        |
| miR-149-5p           | <b>0.000</b>          | 0.095                 | <b>0.005</b>         | <b>0.037</b>       | <b>0.000</b>        |
| miR-203a-3p          | 0.155                 | 0.158                 | 0.677                | 0.528              | 0.095               |
| miR-375              | <b>0.000</b>          | <b>0.044</b>          | <b>0.000</b>         | <b>0.000</b>       | 0.294               |

CIN, cervical intraepithelial neoplasia; SCC, squamous cell carcinoma; AC, adenocarcinoma; p-values < 0.05 in bold.
